# Supplementary material for: Fungal Pathogens Associated with Crown and Root Rot in Wheat-Growing Areas of Northern Kyrgyzstan
Source: MDPI journal article supplement (doi:10.3390/jof9010124), 2023-01-16
Supplement: s1 [file s1]

**Table S1.** GenBank Accession numbers of the representative isolates obtained in this study.

| Species                           | GenBank accession numbers |          |          |          |
|-----------------------------------|---------------------------|----------|----------|----------|
|                                   | Isolate code              | ITS      | TEF1     | RPB2     |
| <i>Bipolaris sorokiniana</i>      | KrBsor01                  | OP709681 | -        | -        |
|                                   | KrBsor02                  | OP709682 | -        | -        |
|                                   | KrBsor03                  | OP709683 | -        | -        |
| <i>Curvularia inaequalis</i>      | KrCina01                  | OP709684 | -        | -        |
|                                   | KrCina02                  | OP709685 | -        | -        |
|                                   | KrCina03                  | OP709686 | -        | -        |
| <i>Macrophomina phaseolina</i>    | KrMpha01                  | OP709678 | -        | -        |
|                                   | KrMpha02                  | OP709679 | -        | -        |
|                                   | KrMpha03                  | OP709680 | -        | -        |
| <i>Microdochium bollleyi</i>      | KrMbol01                  | OP709687 | -        | -        |
|                                   | KrMbol02                  | OP709688 | -        | -        |
|                                   | KrMbol03                  | OP709689 | -        | -        |
| <i>Microdochium nivale</i>        | KrMniv01                  | OP709690 | -        | -        |
|                                   | KrMniv02                  | OP709691 | -        | -        |
|                                   | KrMniv03                  | OP709692 | -        | -        |
| <i>Fusarium pseudograminearum</i> | KrFpg01                   | -        | OP688131 | OP688160 |
|                                   | KrFpg02                   | -        | OP688132 | OP688161 |
|                                   | KrFpg03                   | -        | OP688133 | OP688162 |
| <i>Fusarium culmorum</i>          | KrFcul01                  | -        | OP688134 | OP688163 |
|                                   | KrFcul02                  | -        | OP688135 | OP688164 |
|                                   | KrFcul03                  | -        | OP688136 | OP688165 |
| <i>Fusarium nygamai</i>           | KrFnyg01                  | -        | OP688137 | OP688166 |
|                                   | KrFnyg02                  | -        | OP688138 | OP688167 |
|                                   | KrFnyg03                  | -        | OP688139 | OP688168 |
| <i>Fusarium redolens</i>          | KrFred01                  | -        | OP688140 | OP688169 |
|                                   | KrFred02                  | -        | OP688141 | OP688170 |
|                                   | KrFred03                  | -        | OP688142 | OP688171 |
| <i>Fusarium oxysporum</i>         | KrFoxy01                  | -        | OP688143 | OP688172 |
|                                   | KrFoxy02                  | -        | OP688144 | OP688173 |
|                                   | KrFoxy03                  | -        | OP688145 | OP688174 |
| <i>Fusarium acuminatum</i>        | KrFacu01                  | -        | OP688146 | OP688175 |
|                                   | KrFacu02                  | -        | OP688147 | OP688176 |
|                                   | KrFacu03                  | -        | OP688148 | OP688177 |
| <i>Fusarium equiseti</i>          | KrFequ01                  | -        | OP688149 | OP688178 |
|                                   | KrFequ02                  | -        | OP688150 | OP688179 |
|                                   | KrFequ03                  | -        | OP688151 | OP688180 |
| <i>Fusarium proliferatum</i>      | KrFpro01                  | -        | OP688152 | OP688181 |
|                                   | KrFpro02                  | -        | OP688153 | OP688182 |
| <i>Fusarium burgessii</i>         | KrFbur01                  | -        | OP688154 | OP688183 |
|                                   | KrFbur02                  | -        | OP688155 | OP688184 |
| <i>Fusarium tricinctum</i>        | KrFtri01                  | -        | OP688156 | OP688185 |
|                                   | KrFtri002                 | -        | OP688157 | OP688186 |
| <i>Fusarium algeriense</i>        | KrFalg01                  | -        | OP688158 | OP688187 |
| <i>Fusarium solani</i>            | KrFsol01                  | -        | OP688159 | OP688188 |
